# Supplementary material for: Changes in long non-coding RNA expression profiles related to the antagonistic effects of Escherichia coli F17 on lamb spleens
Source: PubMed Central journal article supplement (PMC6224397; doi:10.1038/s41598-018-34291-0), 2018-11-08
Supplement: 41598_2018_34291_MOESM1_ESM.pdf [file 41598_2018_34291_MOESM1_ESM.pdf]

## Title page

### 1) the title of the manuscript

*Changes in long non-coding RNA expression profiles related to the antagonistic effects of Escherichia coli F17 on lamb spleens*

### 2) the author list

Corresponding Author: **Wei Sun**

Company/ Institution: College of Animal Science and Technology, Yangzhou University  
Address: 48 Wenhui East Road, Hanjiang District, Yangzhou 225009, Jiangsu, P. R. China.

Contributing Author: **Jianjun Bao**

Company/ Institution: College of Animal Science and Technology, Yangzhou University  
Address: 48 Wenhui East Road, Hanjiang District, Yangzhou 225009, Jiangsu, P. R. China.

Contributing Author: **Chengyan Jin**

Company/ Institution: College of Animal Science and Technology, Yangzhou University  
Address: 48 Wenhui East Road, Hanjiang District, Yangzhou 225009, Jiangsu, P. R. China.

Contributing Author: **Yue Wang**

Company/ Institution: College of Animal Science and Technology, Yangzhou University  
Address: 48 Wenhui East Road, Hanjiang District, Yangzhou 225009, Jiangsu, P. R. China.

Contributing Author: **Weihao Chen**

Company/ Institution: College of Animal Science and Technology, Yangzhou University  
Address: 48 Wenhui East Road, Hanjiang District, Yangzhou 225009, Jiangsu, P. R. China.

Contributing Author: **Tianyi Wu**

Company/ Institution: College of Animal Science and Technology, Yangzhou University  
Address: 48 Wenhui East Road, Hanjiang District, Yangzhou 225009, Jiangsu, P. R. China.

Contributing Author: **Lihong Wang**

Company/ Institution: College of Animal Science and Technology, Yangzhou University  
Address: 48 Wenhui East Road, Hanjiang District, Yangzhou 225009, Jiangsu, P. R. China.

Contributing Author: **Xiaoyang Lv**

Company/ Institution: College of Animal Science and Technology, Yangzhou University  
Address: 48 Wenhui East Road, Hanjiang District, Yangzhou 225009, Jiangsu, P. R. China.

Contributing Author: **Wen Gao**

Company/ Institution: College of Animal Science and Technology, Yangzhou University  
Address: 48 Wenhui East Road, Hanjiang District, Yangzhou 225009, Jiangsu, P. R. China.

Contributing Author: **Buzhong Wang**

Company/ Institution: Jiangsu Xilaiyuan Ecological Agriculture Co., Ltd.

Address: Dasi Town, Taizhou 225300, Jiangsu, P. R. China.

Contributing Author: **Guoqiang Zhu**

Company/ Institution: College of Veterinary Medicine, Yangzhou University  
Address: 48 Wenhui East Road, Hanjiang District, Yangzhou 225009, Jiangsu, P. R. China.

Contributing Author: **Guojun Dai**

Company/ Institution: College of Animal Science and Technology, Yangzhou University  
Address: 48 Wenhui East Road, Hanjiang District, Yangzhou 225009, Jiangsu, P. R. China.

### 3) a short running head at the head of the title page

lncRNA name-function prediction Term

## lncRNA name-function prediction Term(Gene Ontology)

## Supplementary 1

| lncRNA         | Term_ID    | P_value  | Q_value     |
|----------------|------------|----------|-------------|
| TCONS_00059692 | GO:0044822 | 1.09E-10 | 3.35E-08    |
| TCONS_00083441 | GO:0086080 | 1.16E-08 | 1.63E-06    |
| TCONS_00083441 | GO:0045162 | 1.63E-08 | 1.63E-06    |
| TCONS_00083441 | GO:0019227 | 4.78E-08 | 3.18E-06    |
| TCONS_00107469 | GO:0044822 | 5.03E-08 | 1.61E-05    |
| TCONS_00066324 | GO:0005634 | 4.66E-07 | 9.65E-05    |
| TCONS_00083441 | GO:0007417 | 6.18E-07 | 3.09E-05    |
| TCONS_00083441 | GO:0030506 | 8.00E-07 | 3.20E-05    |
| TCONS_00116477 | GO:0042908 | 1.32E-06 | 0.000137047 |
| TCONS_00116477 | GO:0046618 | 1.32E-06 | 0.000137047 |
| TCONS_00108000 | GO:0005634 | 3.02E-06 | 0.000716889 |
| TCONS_00000678 | GO:0005515 | 3.08E-06 | 0.00079127  |
| TCONS_00001295 | GO:0044822 | 3.49E-06 | 0.000934194 |
| TCONS_00083441 | GO:0010975 | 4.09E-06 | 0.000136207 |
| TCONS_00099925 | GO:0005515 | 4.65E-06 | 0.000973186 |
| TCONS_00059692 | GO:0005634 | 4.81E-06 | 0.000740019 |
| TCONS_00116477 | GO:0030522 | 6.39E-06 | 0.000289175 |
| TCONS_00099925 | GO:0005737 | 6.58E-06 | 0.000973186 |
| TCONS_00116477 | GO:0042738 | 6.62E-06 | 0.000289175 |
| TCONS_00083441 | GO:0034113 | 6.63E-06 | 0.000189498 |
| TCONS_00135735 | GO:0005783 | 6.98E-06 | 0.001831886 |
| TCONS_00116477 | GO:0004879 | 6.98E-06 | 0.000289175 |
| TCONS_00107469 | GO:0005515 | 7.01E-06 | 0.001125105 |
| TCONS_00000678 | GO:0047865 | 7.74E-06 | 0.000994556 |
| TCONS_00083441 | GO:0031290 | 7.90E-06 | 0.000197479 |
| TCONS_00059135 | GO:0015293 | 8.27E-06 | 0.000901603 |
| TCONS_00059135 | GO:0015698 | 9.45E-06 | 0.000901603 |
| TCONS_00001295 | GO:0005096 | 1.06E-05 | 0.000971848 |
| TCONS_00001295 | GO:0005525 | 1.09E-05 | 0.000971848 |
| TCONS_00059692 | GO:0005515 | 1.12E-05 | 0.001149501 |
| TCONS_00180450 | GO:0043271 | 1.17E-05 | 0.002149727 |
| TCONS_00000678 | GO:0009790 | 1.19E-05 | 0.001016161 |
| TCONS_00135735 | GO:0005096 | 1.33E-05 | 0.001831886 |
| TCONS_00066324 | GO:0005654 | 1.39E-05 | 0.001435459 |
| TCONS_00180450 | GO:0015293 | 1.54E-05 | 0.002149727 |
| TCONS_00099925 | GO:0009615 | 1.64E-05 | 0.001614744 |
| TCONS_00152371 | GO:0044822 | 1.67E-05 | 0.002576453 |
| TCONS_00135735 | GO:0005743 | 1.71E-05 | 0.001831886 |
| TCONS_00152371 | GO:0005634 | 1.99E-05 | 0.002576453 |
| TCONS_00053949 | GO:0000166 | 2.47E-05 | 0.006845202 |
| TCONS_00059135 | GO:0005328 | 2.53E-05 | 0.000901603 |
| TCONS_00180450 | GO:0015698 | 3.07E-05 | 0.002149727 |
| TCONS_00059692 | GO:0005743 | 3.16E-05 | 0.002432915 |
| TCONS_00168834 | GO:0005436 | 3.19E-05 | 0.00210741  |
| TCONS_00180450 | GO:0005328 | 3.22E-05 | 0.002149727 |

lncRNA name-function prediction Term(Gene Ontology)

|                |            |           |              |
|----------------|------------|-----------|--------------|
| TCONS_00054903 | GO:0003743 | 3. 33E-05 | 0. 00848847  |
| TCONS_00059135 | GO:0035565 | 3. 43E-05 | 0. 000901603 |
| TCONS_00059135 | GO:0039020 | 3. 43E-05 | 0. 000901603 |
| TCONS_00059135 | GO:0060677 | 3. 43E-05 | 0. 000901603 |
| TCONS_00059135 | GO:0061017 | 3. 43E-05 | 0. 000901603 |
| TCONS_00059135 | GO:0061296 | 3. 43E-05 | 0. 000901603 |
| TCONS_00059135 | GO:0072176 | 3. 43E-05 | 0. 000901603 |
| TCONS_00059135 | GO:0072179 | 3. 43E-05 | 0. 000901603 |
| TCONS_00059135 | GO:1900212 | 3. 43E-05 | 0. 000901603 |
| TCONS_00180450 | GO:0003956 | 3. 51E-05 | 0. 002149727 |
| TCONS_00175552 | GO:0043540 | 3. 57E-05 | 0. 006030915 |
| TCONS_00089741 | GO:0043540 | 3. 61E-05 | 0. 007001035 |
| TCONS_00099925 | GO:0035455 | 3. 91E-05 | 0. 002890935 |
| TCONS_00107469 | GO:0005634 | 4. 09E-05 | 0. 004373177 |
| TCONS_00181075 | GO:0005743 | 4. 39E-05 | 0. 004287948 |
| TCONS_00001295 | GO:0015031 | 4. 44E-05 | 0. 002962467 |
| TCONS_00181075 | GO:0044822 | 4. 59E-05 | 0. 004287948 |
| TCONS_00116477 | GO:0048855 | 4. 82E-05 | 0. 001663001 |
| TCONS_00168834 | GO:0015321 | 4. 90E-05 | 0. 00210741  |
| TCONS_00168834 | GO:0035435 | 4. 90E-05 | 0. 00210741  |
| TCONS_00168834 | GO:0044341 | 4. 90E-05 | 0. 00210741  |
| TCONS_00180450 | GO:0006638 | 5. 12E-05 | 0. 002149727 |
| TCONS_00111709 | GO:0005436 | 5. 15E-05 | 0. 002910784 |
| TCONS_00181075 | GO:0005634 | 5. 34E-05 | 0. 004287948 |
| TCONS_00001295 | GO:0000166 | 5. 53E-05 | 0. 002962467 |
| TCONS_00000679 | GO:0001726 | 5. 58E-05 | 0. 009430322 |
| TCONS_00059135 | GO:0005496 | 5. 64E-05 | 0. 001095082 |
| TCONS_00111709 | GO:0007613 | 5. 88E-05 | 0. 002910784 |
| TCONS_00008583 | GO:0043540 | 5. 91E-05 | 0. 007290876 |
| TCONS_00175552 | GO:0004331 | 5. 92E-05 | 0. 006030915 |
| TCONS_00028510 | GO:0005436 | 5. 98E-05 | 0. 004024213 |
| TCONS_00089741 | GO:0004331 | 5. 98E-05 | 0. 007001035 |
| TCONS_00059135 | GO:0042663 | 6. 06E-05 | 0. 001095082 |
| TCONS_00059135 | GO:0060261 | 6. 06E-05 | 0. 001095082 |
| TCONS_00059135 | GO:0072095 | 6. 06E-05 | 0. 001095082 |
| TCONS_00059135 | GO:0072181 | 6. 06E-05 | 0. 001095082 |
| TCONS_00175552 | GO:0043116 | 6. 44E-05 | 0. 006030915 |
| TCONS_00181075 | GO:0005515 | 6. 47E-05 | 0. 004287948 |
| TCONS_00083441 | GO:0000268 | 6. 70E-05 | 0. 001340722 |
| TCONS_00083441 | GO:0005052 | 6. 70E-05 | 0. 001340722 |
| TCONS_00089751 | GO:0043540 | 6. 73E-05 | 0. 009519558 |
| TCONS_00059692 | GO:0005654 | 6. 74E-05 | 0. 004152042 |
| TCONS_00000678 | GO:0030216 | 6. 77E-05 | 0. 004352369 |
| TCONS_00059135 | GO:0007605 | 6. 87E-05 | 0. 001167803 |
| TCONS_00107469 | GO:0005737 | 7. 27E-05 | 0. 005836439 |
| TCONS_00008583 | GO:1903025 | 7. 28E-05 | 0. 007290876 |
| TCONS_00168834 | GO:0006817 | 7. 28E-05 | 0. 002504569 |

lncRNA name-function prediction Term(Gene Ontology)

|                |            |              |              |
|----------------|------------|--------------|--------------|
| TCONS_00111709 | GO:0014819 | 7. 90E-05    | 0. 002910784 |
| TCONS_00111709 | GO:0015321 | 7. 90E-05    | 0. 002910784 |
| TCONS_00111709 | GO:0015368 | 7. 90E-05    | 0. 002910784 |
| TCONS_00111709 | GO:0035435 | 7. 90E-05    | 0. 002910784 |
| TCONS_00111709 | GO:0044341 | 7. 90E-05    | 0. 002910784 |
| TCONS_00083441 | GO:0016925 | 7. 94E-05    | 0. 001444022 |
| TCONS_00135735 | GO:0005737 | 9. 00E-05    | 0. 00602318  |
| TCONS_00099925 | GO:0051092 | 9. 14E-05    | 0. 005408064 |
| TCONS_00028510 | GO:0015321 | 9. 15E-05    | 0. 004024213 |
| TCONS_00028510 | GO:0035435 | 9. 15E-05    | 0. 004024213 |
| TCONS_00028510 | GO:0044341 | 9. 15E-05    | 0. 004024213 |
| TCONS_00180450 | GO:0035565 | 9. 23E-05    | 0. 002149727 |
| TCONS_00180450 | GO:0039020 | 9. 23E-05    | 0. 002149727 |
| TCONS_00180450 | GO:0060677 | 9. 23E-05    | 0. 002149727 |
| TCONS_00180450 | GO:0061017 | 9. 23E-05    | 0. 002149727 |
| TCONS_00180450 | GO:0061296 | 9. 23E-05    | 0. 002149727 |
| TCONS_00180450 | GO:0072176 | 9. 23E-05    | 0. 002149727 |
| TCONS_00180450 | GO:0072179 | 9. 23E-05    | 0. 002149727 |
| TCONS_00180450 | GO:1900212 | 9. 23E-05    | 0. 002149727 |
| TCONS_00008583 | GO:0004331 | 9. 76E-05    | 0. 007290876 |
| TCONS_00059135 | GO:0001714 | 0. 000100158 | 0. 001315716 |
| TCONS_00059135 | GO:0005332 | 0. 000100158 | 0. 001315716 |
| TCONS_00059135 | GO:0048793 | 0. 000100158 | 0. 001315716 |
| TCONS_00059135 | GO:0072164 | 0. 000100158 | 0. 001315716 |
| TCONS_00059135 | GO:0072177 | 0. 000100158 | 0. 001315716 |
| TCONS_00066324 | GO:0048512 | 0. 000103442 | 0. 005507589 |
| TCONS_00168834 | GO:0030643 | 0. 000104983 | 0. 003009514 |
| TCONS_00111709 | GO:0006851 | 0. 000105571 | 0. 003016117 |
| TCONS_00066324 | GO:0030332 | 0. 000106427 | 0. 005507589 |
| TCONS_00059135 | GO:0006836 | 0. 000107712 | 0. 00135342  |
| TCONS_00089751 | GO:0004331 | 0. 000111044 | 0. 009519558 |
| TCONS_00107469 | GO:0006911 | 0. 000112503 | 0. 007222667 |
| TCONS_00108000 | GO:0031369 | 0. 000113282 | 0. 013423972 |
| TCONS_00111709 | GO:0005432 | 0. 000116904 | 0. 003016117 |
| TCONS_00111709 | GO:0006817 | 0. 000116904 | 0. 003016117 |
| TCONS_00135735 | GO:0005747 | 0. 000120229 | 0. 00602318  |
| TCONS_00099739 | GO:0090214 | 0. 000129357 | 0. 024836528 |
| TCONS_00066898 | GO:0005158 | 0. 000132983 | 0. 01934966  |
| TCONS_00135735 | GO:0044822 | 0. 000133182 | 0. 00602318  |
| TCONS_00066898 | GO:0005515 | 0. 000133908 | 0. 01934966  |
| TCONS_00028510 | GO:0006817 | 0. 000135226 | 0. 004759956 |
| TCONS_00181075 | GO:0048009 | 0. 000136275 | 0. 007222567 |
| TCONS_00107469 | GO:0006457 | 0. 000140162 | 0. 007498651 |
| TCONS_00059692 | GO:0005730 | 0. 000147099 | 0. 007340729 |
| TCONS_00175552 | GO:0050429 | 0. 00014788  | 0. 008310859 |
| TCONS_00175552 | GO:0052548 | 0. 00014788  | 0. 008310859 |
| TCONS_00180450 | GO:0006836 | 0. 000148561 | 0. 00277433  |

lncRNA name-function prediction Term(Gene Ontology)

|                |            |             |             |
|----------------|------------|-------------|-------------|
| TCONS_00089741 | GO:0050429 | 0.000149178 | 0.008726933 |
| TCONS_00089741 | GO:0052548 | 0.000149178 | 0.008726933 |
| TCONS_00099925 | GO:0048512 | 0.000150069 | 0.00658953  |
| TCONS_00135735 | GO:0005793 | 0.000150504 | 0.00602318  |
| TCONS_00099925 | GO:0040023 | 0.000155833 | 0.00658953  |
| TCONS_00135735 | GO:0009615 | 0.000155971 | 0.00602318  |
| TCONS_00059135 | GO:0001826 | 0.000156853 | 0.001813225 |
| TCONS_00059135 | GO:0015812 | 0.000156853 | 0.001813225 |
| TCONS_00180450 | GO:0042663 | 0.000161694 | 0.00277433  |
| TCONS_00180450 | GO:0060261 | 0.000161694 | 0.00277433  |
| TCONS_00180450 | GO:0072095 | 0.000161694 | 0.00277433  |
| TCONS_00180450 | GO:0072181 | 0.000161694 | 0.00277433  |
| TCONS_00059135 | GO:0043271 | 0.00016356  | 0.00181803  |
| TCONS_00040392 | GO:0034113 | 0.000165226 | 0.015489765 |
| TCONS_00059692 | GO:0048026 | 0.000166835 | 0.007340729 |
| TCONS_00111709 | GO:0030643 | 0.000167966 | 0.003939576 |
| TCONS_00152371 | GO:0005737 | 0.00016914  | 0.014602434 |
| TCONS_00180450 | GO:0007605 | 0.000174174 | 0.002788702 |
| TCONS_00135735 | GO:0043209 | 0.000175492 | 0.00602318  |
| TCONS_00180450 | GO:0044212 | 0.00017964  | 0.002788702 |
| TCONS_00019890 | GO:0042641 | 0.000180414 | 0.029253812 |
| TCONS_00135735 | GO:0005515 | 0.000187055 | 0.00602318  |
| TCONS_00181075 | GO:0006911 | 0.000188588 | 0.008329296 |
| TCONS_00111709 | GO:0005778 | 0.000191072 | 0.004108049 |
| TCONS_00008583 | GO:0030890 | 0.000191963 | 0.008292375 |
| TCONS_00028510 | GO:0030643 | 0.000194065 | 0.005692574 |
| TCONS_00111084 | GO:0034968 | 0.000197013 | 0.01941794  |
| TCONS_00168834 | GO:0042301 | 0.000202575 | 0.004977552 |
| TCONS_00175552 | GO:0042592 | 0.0002033   | 0.009521238 |
| TCONS_00019890 | GO:0090214 | 0.000209705 | 0.029253812 |
| TCONS_00111084 | GO:0005158 | 0.000212814 | 0.01941794  |
| TCONS_00116477 | GO:0033554 | 0.000218511 | 0.006461681 |
| TCONS_00053949 | GO:0055007 | 0.000219382 | 0.020583479 |
| TCONS_00008583 | GO:0050429 | 0.000222117 | 0.008292375 |
| TCONS_00008583 | GO:0052548 | 0.000222117 | 0.008292375 |
| TCONS_00111084 | GO:0004004 | 0.000222343 | 0.01941794  |
| TCONS_00059135 | GO:0090214 | 0.000226757 | 0.002427137 |
| TCONS_00040392 | GO:0031012 | 0.000228357 | 0.015489765 |
| TCONS_00107469 | GO:0048026 | 0.000233934 | 0.010727556 |
| TCONS_00180450 | GO:0022408 | 0.000236179 | 0.003197557 |
| TCONS_00089035 | GO:0050429 | 0.000236843 | 0.026407949 |
| TCONS_00089035 | GO:0052548 | 0.000236843 | 0.026407949 |
| TCONS_00000678 | GO:0006544 | 0.000242014 | 0.012439512 |
| TCONS_00054903 | GO:0097155 | 0.000246121 | 0.009215942 |
| TCONS_00054903 | GO:0097156 | 0.000246121 | 0.009215942 |
| TCONS_00054903 | GO:0097161 | 0.000246121 | 0.009215942 |
| TCONS_00054903 | GO:2001108 | 0.000246121 | 0.009215942 |

lncRNA name-function prediction Term(Gene Ontology)

|                |            |             |             |
|----------------|------------|-------------|-------------|
| TCONS_00089751 | GO:0002071 | 0.000246621 | 0.009519558 |
| TCONS_00089751 | GO:0050429 | 0.000246621 | 0.009519558 |
| TCONS_00089751 | GO:0052548 | 0.000246621 | 0.009519558 |
| TCONS_00000679 | GO:0000166 | 0.000247948 | 0.020951566 |
| TCONS_00053949 | GO:0060742 | 0.000251977 | 0.020583479 |
| TCONS_00180450 | GO:0001714 | 0.000264828 | 0.003197557 |
| TCONS_00180450 | GO:0005332 | 0.000264828 | 0.003197557 |
| TCONS_00180450 | GO:0048793 | 0.000264828 | 0.003197557 |
| TCONS_00180450 | GO:0072164 | 0.000264828 | 0.003197557 |
| TCONS_00180450 | GO:0072177 | 0.000264828 | 0.003197557 |
| TCONS_00001295 | GO:0005634 | 0.000266468 | 0.011902259 |
| TCONS_00066898 | GO:0044822 | 0.000267062 | 0.023785608 |
| TCONS_00054903 | GO:0004004 | 0.000270475 | 0.009215942 |
| TCONS_00111709 | GO:0008385 | 0.000270541 | 0.005369203 |
| TCONS_00040392 | GO:0010484 | 0.000285132 | 0.015489765 |
| TCONS_00175552 | GO:0003873 | 0.00028613  | 0.011486083 |
| TCONS_00089741 | GO:0003873 | 0.000289139 | 0.012372866 |
| TCONS_00054903 | GO:0005158 | 0.000290566 | 0.009215942 |
| TCONS_00053949 | GO:0000381 | 0.000297234 | 0.020583479 |
| TCONS_00135735 | GO:0005509 | 0.000298801 | 0.008746706 |
| TCONS_00001295 | GO:0005737 | 0.000321056 | 0.01229186  |
| TCONS_00111709 | GO:0042301 | 0.000321809 | 0.005930473 |
| TCONS_00116477 | GO:0006590 | 0.000326695 | 0.007513975 |
| TCONS_00116477 | GO:0016174 | 0.000326695 | 0.007513975 |
| TCONS_00059135 | GO:0022408 | 0.000326785 | 0.003328205 |
| TCONS_00089741 | GO:0005515 | 0.000332381 | 0.012372866 |
| TCONS_00099925 | GO:0090286 | 0.000338086 | 0.012509181 |
| TCONS_00059135 | GO:0048806 | 0.000339964 | 0.003328205 |
| TCONS_00040392 | GO:0043009 | 0.000342315 | 0.015489765 |
| TCONS_00059135 | GO:0030259 | 0.000345488 | 0.003328205 |
| TCONS_00107469 | GO:0006357 | 0.000347817 | 0.013956164 |
| TCONS_00033508 | GO:0019882 | 0.000352976 | 0.038668629 |
| TCONS_00168834 | GO:0031402 | 0.000360441 | 0.007749485 |
| TCONS_00108000 | GO:0044822 | 0.000360699 | 0.022299178 |
| TCONS_00175552 | GO:0004435 | 0.000364143 | 0.012246387 |
| TCONS_00054903 | GO:0061001 | 0.000370921 | 0.009215942 |
| TCONS_00028510 | GO:0042301 | 0.000370947 | 0.009326665 |
| TCONS_00066324 | GO:0035329 | 0.000373939 | 0.012962804 |
| TCONS_00083441 | GO:0071600 | 0.000380536 | 0.00634227  |
| TCONS_00066324 | GO:0043536 | 0.000387274 | 0.012962804 |
| TCONS_00111709 | GO:0046835 | 0.000390864 | 0.006722856 |
| TCONS_00175552 | GO:0006003 | 0.000392233 | 0.012246387 |
| TCONS_00089741 | GO:0006003 | 0.000396328 | 0.012372866 |
| TCONS_00054903 | GO:0021957 | 0.00039755  | 0.009215942 |
| TCONS_00054903 | GO:0048681 | 0.00039755  | 0.009215942 |
| TCONS_00054903 | GO:0048710 | 0.00039755  | 0.009215942 |
| TCONS_00107469 | GO:0019843 | 0.000401338 | 0.013972006 |

lncRNA name-function prediction Term(Gene Ontology)

|                |            |             |             |
|----------------|------------|-------------|-------------|
| TCONS_00180450 | GO:0001826 | 0.000411182 | 0.004469872 |
| TCONS_00180450 | GO:0015812 | 0.000411182 | 0.004469872 |
| TCONS_00180450 | GO:0030259 | 0.000411338 | 0.004469872 |
| TCONS_00066898 | GO:0004004 | 0.000411516 | 0.023785608 |
| TCONS_00066898 | GO:0060081 | 0.000411516 | 0.023785608 |
| TCONS_00089741 | GO:0071346 | 0.000423004 | 0.012372866 |
| TCONS_00059135 | GO:0008144 | 0.000424631 | 0.003958659 |
| TCONS_00089751 | GO:0046339 | 0.000428084 | 0.012706273 |
| TCONS_00001295 | GO:0003924 | 0.000428224 | 0.01387472  |
| TCONS_00157353 | GO:0045022 | 0.000432599 | 0.032004554 |
| TCONS_00107469 | GO:0005743 | 0.000435265 | 0.013972006 |
| TCONS_00066324 | GO:0004843 | 0.000438356 | 0.012962804 |
| TCONS_00099925 | GO:0005634 | 0.00043938  | 0.014450736 |
| TCONS_00157353 | GO:0030897 | 0.000442739 | 0.032004554 |
| TCONS_00180450 | GO:0030111 | 0.00045729  | 0.004808918 |
| TCONS_00028509 | GO:0008499 | 0.000457686 | 0.038614573 |
| TCONS_00040392 | GO:0070062 | 0.000457847 | 0.01657407  |
| TCONS_00181075 | GO:0005096 | 0.000462402 | 0.016075493 |
| TCONS_00008583 | GO:0003873 | 0.00046503  | 0.014880969 |
| TCONS_00099739 | GO:0043484 | 0.000482503 | 0.025353553 |
| TCONS_00181075 | GO:0005747 | 0.000485298 | 0.016075493 |
| TCONS_00111084 | GO:0008499 | 0.000496344 | 0.0242726   |
| TCONS_00180450 | GO:0090214 | 0.000501076 | 0.005104707 |
| TCONS_00099925 | GO:0045071 | 0.000501437 | 0.014842525 |
| TCONS_00019890 | GO:0030506 | 0.000505397 | 0.032386812 |
| TCONS_00054903 | GO:0046854 | 0.00051387  | 0.010919744 |
| TCONS_00089751 | GO:0001843 | 0.000514203 | 0.012706273 |
| TCONS_00001295 | GO:0052548 | 0.000514441 | 0.01387472  |
| TCONS_00116477 | GO:0005954 | 0.000515783 | 0.01067671  |
| TCONS_00001295 | GO:2001214 | 0.000517713 | 0.01387472  |
| TCONS_00089751 | GO:0003873 | 0.000526685 | 0.012706273 |
| TCONS_00175552 | GO:0045022 | 0.000527083 | 0.014811023 |
| TCONS_00019890 | GO:0086080 | 0.000527973 | 0.032386812 |
| TCONS_00059692 | GO:0005737 | 0.000528075 | 0.020330891 |
| TCONS_00083441 | GO:0035088 | 0.000533008 | 0.007106773 |
| TCONS_00083441 | GO:0071599 | 0.000533008 | 0.007106773 |
| TCONS_00083441 | GO:0072513 | 0.000533008 | 0.007106773 |
| TCONS_00135735 | GO:0008137 | 0.000533847 | 0.014324906 |
| TCONS_00089741 | GO:0031012 | 0.000540727 | 0.013611827 |
| TCONS_00059135 | GO:0003700 | 0.00054242  | 0.004898727 |
| TCONS_00108000 | GO:0042835 | 0.000553191 | 0.022299178 |
| TCONS_00099925 | GO:0034993 | 0.000558573 | 0.015030695 |
| TCONS_00111709 | GO:0031402 | 0.00056855  | 0.008896132 |
| TCONS_00028509 | GO:0009312 | 0.000573625 | 0.038614573 |
| TCONS_00028509 | GO:0033391 | 0.000573625 | 0.038614573 |
| TCONS_00111709 | GO:0007612 | 0.000586179 | 0.008896132 |
| TCONS_00162688 | GO:0008499 | 0.00058831  | 0.043957575 |

lncRNA name-function prediction Term(Gene Ontology)

|                |            |             |             |
|----------------|------------|-------------|-------------|
| TCONS_00000679 | GO:0003779 | 0.000589008 | 0.033180806 |
| TCONS_00108000 | GO:0005654 | 0.000592091 | 0.022299178 |
| TCONS_00059135 | GO:0030111 | 0.000595753 | 0.005083844 |
| TCONS_00107469 | GO:0001702 | 0.000596842 | 0.017416949 |
| TCONS_00059135 | GO:0030506 | 0.000598099 | 0.005083844 |
| TCONS_00135735 | GO:0045333 | 0.000604421 | 0.014971044 |
| TCONS_00175552 | GO:0071773 | 0.000608418 | 0.015417212 |
| TCONS_00083441 | GO:0016337 | 0.000609275 | 0.007313752 |
| TCONS_00180450 | GO:0042312 | 0.000611172 | 0.006037643 |
| TCONS_00108000 | GO:0046854 | 0.000631244 | 0.022299178 |
| TCONS_00008583 | GO:0006003 | 0.00063513  | 0.017783647 |
| TCONS_00019890 | GO:0045162 | 0.000635616 | 0.032386812 |
| TCONS_00089741 | GO:0060346 | 0.000639305 | 0.013611827 |
| TCONS_00089741 | GO:0043209 | 0.000639872 | 0.013611827 |
| TCONS_00033508 | GO:0030866 | 0.000641156 | 0.038668629 |
| TCONS_00028510 | GO:0031402 | 0.000653848 | 0.014384666 |
| TCONS_00059692 | GO:0006457 | 0.000654248 | 0.02039883  |
| TCONS_00066898 | GO:0005634 | 0.000659488 | 0.031765331 |
| TCONS_00099739 | GO:0005765 | 0.000660403 | 0.025353553 |
| TCONS_00089035 | GO:0043540 | 0.000661294 | 0.042992185 |
| TCONS_00059692 | GO:0030529 | 0.0006623   | 0.02039883  |
| TCONS_00107469 | GO:0046854 | 0.000678043 | 0.018137655 |
| TCONS_00175552 | GO:1901522 | 0.000690191 | 0.015417212 |
| TCONS_00089751 | GO:0005524 | 0.000692413 | 0.013869127 |
| TCONS_00019890 | GO:0023051 | 0.000696491 | 0.032386812 |
| TCONS_00083441 | GO:0031267 | 0.000703484 | 0.007313752 |
| TCONS_00111084 | GO:0016192 | 0.0007046   | 0.0242726   |
| TCONS_00054903 | GO:0006413 | 0.000711929 | 0.013774444 |
| TCONS_00175552 | GO:0006886 | 0.000713252 | 0.015417212 |
| TCONS_00089751 | GO:0006003 | 0.000718608 | 0.013869127 |
| TCONS_00000678 | GO:0008544 | 0.000725245 | 0.030974628 |
| TCONS_00083441 | GO:0007501 | 0.000727163 | 0.007313752 |
| TCONS_00083441 | GO:0014706 | 0.000727163 | 0.007313752 |
| TCONS_00083441 | GO:0010212 | 0.000731375 | 0.007313752 |
| TCONS_00108000 | GO:0043484 | 0.000737987 | 0.022299178 |
| TCONS_00053949 | GO:0003729 | 0.000741665 | 0.033041482 |
| TCONS_00001295 | GO:0031532 | 0.000743466 | 0.018113524 |
| TCONS_00107469 | GO:0030029 | 0.000749537 | 0.0185078   |
| TCONS_00108000 | GO:0031492 | 0.000752715 | 0.022299178 |
| TCONS_00054903 | GO:0033135 | 0.000756244 | 0.013774444 |
| TCONS_00162688 | GO:0009312 | 0.000759518 | 0.043957575 |
| TCONS_00162688 | GO:0033391 | 0.000759518 | 0.043957575 |
| TCONS_00152371 | GO:0043484 | 0.000761582 | 0.039091718 |
| TCONS_00059135 | GO:0060993 | 0.000774584 | 0.006395853 |
| TCONS_00008583 | GO:0032259 | 0.00078712  | 0.019590545 |
| TCONS_00053949 | GO:0022904 | 0.000787937 | 0.033041482 |
| TCONS_00033508 | GO:0005515 | 0.000795235 | 0.038668629 |



lncRNA name-function prediction Term(Gene Ontology)

|                |            |             |             |
|----------------|------------|-------------|-------------|
| TCONS_00152371 | GO:0005096 | 0.000801971 | 0.039091718 |
| TCONS_00059692 | GO:0005739 | 0.000808322 | 0.02252472  |
| TCONS_00157353 | GO:0043951 | 0.000823681 | 0.032004554 |
| TCONS_00116477 | GO:0035694 | 0.000827503 | 0.014274429 |
| TCONS_00116477 | GO:0035695 | 0.000827503 | 0.014274429 |
| TCONS_00019890 | GO:0005634 | 0.000839775 | 0.033471033 |
| TCONS_00111709 | GO:0004004 | 0.000841821 | 0.01149231  |
| TCONS_00000678 | GO:2000393 | 0.000843667 | 0.030974628 |
| TCONS_00111709 | GO:0051560 | 0.000846333 | 0.01149231  |
| TCONS_00181075 | GO:0048026 | 0.000848509 | 0.022644513 |
| TCONS_00053949 | GO:0006355 | 0.000856626 | 0.033041482 |
| TCONS_00059135 | GO:0033192 | 0.000868641 | 0.006973259 |
| TCONS_00180450 | GO:0048806 | 0.00087605  | 0.00839977  |
| TCONS_00059692 | GO:0005681 | 0.000877586 | 0.02252472  |
| TCONS_00099925 | GO:0043153 | 0.000882926 | 0.021778851 |
| TCONS_00054903 | GO:0042802 | 0.000884695 | 0.015039819 |
| TCONS_00135735 | GO:0006911 | 0.000887852 | 0.020420589 |
| TCONS_00040392 | GO:0033593 | 0.000918623 | 0.023752967 |
| TCONS_00040392 | GO:0070200 | 0.000918623 | 0.023752967 |
| TCONS_00099739 | GO:0005681 | 0.000919929 | 0.025353553 |
| TCONS_00033508 | GO:0033141 | 0.00092003  | 0.038668629 |
| TCONS_00175552 | GO:0001710 | 0.000921219 | 0.015461895 |
| TCONS_00175552 | GO:0005515 | 0.000930393 | 0.015461895 |
| TCONS_00001295 | GO:0000502 | 0.000931704 | 0.020808055 |
| TCONS_00180450 | GO:0043401 | 0.000940067 | 0.008694451 |
| TCONS_00168834 | GO:0061458 | 0.000950637 | 0.018167724 |
| TCONS_00111084 | GO:0048771 | 0.000952949 | 0.0242726   |
| TCONS_00180450 | GO:0006471 | 0.000960123 | 0.008694451 |
| TCONS_00059135 | GO:0004883 | 0.000961092 | 0.007011245 |
| TCONS_00059135 | GO:0038051 | 0.000961092 | 0.007011245 |
| TCONS_00059135 | GO:0043402 | 0.000961092 | 0.007011245 |
| TCONS_00083441 | GO:0048752 | 0.000969642 | 0.008814924 |
| TCONS_00083441 | GO:0048856 | 0.000969642 | 0.008814924 |
| TCONS_00059135 | GO:0006366 | 0.000970414 | 0.007011245 |
| TCONS_00000678 | GO:2001214 | 0.000972415 | 0.031238846 |
| TCONS_00175552 | GO:0043394 | 0.000973875 | 0.015461895 |
| TCONS_00099739 | GO:0042116 | 0.000976913 | 0.025353553 |
| TCONS_00108000 | GO:0003729 | 0.000997881 | 0.024774593 |
| TCONS_00089035 | GO:0004331 | 0.001002613 | 0.042992185 |
| TCONS_00099739 | GO:0048771 | 0.001009418 | 0.025353553 |
| TCONS_00111709 | GO:2000147 | 0.001013894 | 0.012344873 |
| TCONS_00066324 | GO:0005737 | 0.001014269 | 0.026244209 |
| TCONS_00157353 | GO:0048771 | 0.00102327  | 0.032004554 |
| TCONS_00099739 | GO:0005515 | 0.001024932 | 0.025353553 |
| TCONS_00111709 | GO:0015095 | 0.001028423 | 0.012344873 |
| TCONS_00019890 | GO:0097225 | 0.001037683 | 0.036189196 |
| TCONS_00111709 | GO:0003743 | 0.001052664 | 0.012344873 |

lncRNA name-function prediction Term(Gene Ontology)

|                |            |             |             |
|----------------|------------|-------------|-------------|
| TCONS_00053949 | GO:1904417 | 0.001063494 | 0.033041482 |
| TCONS_00168834 | GO:0008378 | 0.001063727 | 0.018296099 |
| TCONS_00181075 | GO:0006367 | 0.001066665 | 0.022644513 |
| TCONS_00053949 | GO:0002021 | 0.00107355  | 0.033041482 |
| TCONS_00054903 | GO:0048771 | 0.00107746  | 0.016339756 |
| TCONS_00107469 | GO:0030036 | 0.001082345 | 0.022894769 |
| TCONS_00116477 | GO:0006805 | 0.00108519  | 0.016548874 |
| TCONS_00054903 | GO:0016307 | 0.001089317 | 0.016339756 |
| TCONS_00107469 | GO:0005747 | 0.001098935 | 0.022894769 |
| TCONS_00181075 | GO:0003714 | 0.001099005 | 0.022644513 |
| TCONS_00152371 | GO:0001726 | 0.001112583 | 0.039091718 |
| TCONS_00135735 | GO:0002526 | 0.001113834 | 0.023910314 |
| TCONS_00175552 | GO:0033141 | 0.00111618  | 0.015461895 |
| TCONS_00180450 | GO:0005496 | 0.001118135 | 0.009851675 |
| TCONS_00116477 | GO:0004601 | 0.001119248 | 0.016548874 |
| TCONS_00152371 | GO:0005515 | 0.001120272 | 0.039091718 |
| TCONS_00059135 | GO:0001077 | 0.001122118 | 0.007909563 |
| TCONS_00089741 | GO:0031056 | 0.001123535 | 0.020992453 |
| TCONS_00175552 | GO:0071672 | 0.001131197 | 0.015461895 |
| TCONS_00099925 | GO:0005521 | 0.001135339 | 0.022372565 |
| TCONS_00107469 | GO:0003714 | 0.001141172 | 0.022894769 |
| TCONS_00181075 | GO:0060612 | 0.001144746 | 0.022644513 |
| TCONS_00059692 | GO:0030855 | 0.001151809 | 0.027035146 |
| TCONS_00181075 | GO:0008137 | 0.001152873 | 0.022644513 |
| TCONS_00108000 | GO:0048771 | 0.00115325  | 0.024774593 |
| TCONS_00033508 | GO:0006886 | 0.001154414 | 0.038668629 |
| TCONS_00001295 | GO:0005801 | 0.001158821 | 0.022424426 |
| TCONS_00089751 | GO:0003779 | 0.001161084 | 0.020371747 |
| TCONS_00175552 | GO:0097178 | 0.001167739 | 0.015461895 |
| TCONS_00033508 | GO:0043219 | 0.0011699   | 0.038668629 |
| TCONS_00001295 | GO:0001817 | 0.001171425 | 0.022424426 |
| TCONS_00181075 | GO:0015629 | 0.001196314 | 0.022644513 |
| TCONS_00180450 | GO:0051454 | 0.001217753 | 0.010179162 |
| TCONS_00180450 | GO:0060081 | 0.001217753 | 0.010179162 |
| TCONS_00107469 | GO:0005730 | 0.001218505 | 0.023008245 |
| TCONS_00033508 | GO:0042127 | 0.001220342 | 0.038668629 |
| TCONS_00000678 | GO:0032968 | 0.001223026 | 0.034924198 |
| TCONS_00066898 | GO:0033180 | 0.001235709 | 0.042234729 |
| TCONS_00066898 | GO:0043951 | 0.001235709 | 0.042234729 |
| TCONS_00111709 | GO:0015693 | 0.00123992  | 0.013908665 |
| TCONS_00157353 | GO:0070695 | 0.001240653 | 0.032004554 |
| TCONS_00157353 | GO:1903206 | 0.001240653 | 0.032004554 |
| TCONS_00033508 | GO:0019722 | 0.00124573  | 0.038668629 |
| TCONS_00108000 | GO:0000790 | 0.00124596  | 0.024774593 |
| TCONS_00083441 | GO:0048665 | 0.001267381 | 0.011020709 |
| TCONS_00108000 | GO:0006376 | 0.001267852 | 0.024774593 |
| TCONS_00066324 | GO:0005515 | 0.001280751 | 0.028992699 |

lncRNA name-function prediction Term(Gene Ontology)

|                |            |             |             |
|----------------|------------|-------------|-------------|
| TCONS_00175552 | GO:0002051 | 0.001289285 | 0.015461895 |
| TCONS_00059692 | GO:0006778 | 0.001291615 | 0.027035146 |
| TCONS_00089741 | GO:0000435 | 0.001300135 | 0.020992453 |
| TCONS_00089741 | GO:2001038 | 0.001300135 | 0.020992453 |
| TCONS_00152371 | GO:0008203 | 0.001312724 | 0.039091718 |
| TCONS_00059135 | GO:0031290 | 0.001314695 | 0.009046354 |
| TCONS_00059692 | GO:0008429 | 0.001316647 | 0.027035146 |
| TCONS_00099739 | GO:0005634 | 0.001324611 | 0.025353553 |
| TCONS_00099925 | GO:0035212 | 0.001343805 | 0.022372565 |
| TCONS_00099925 | GO:1990244 | 0.001343805 | 0.022372565 |
| TCONS_00099925 | GO:1990245 | 0.001343805 | 0.022372565 |
| TCONS_00108000 | GO:0005681 | 0.001358944 | 0.024774593 |
| TCONS_00099925 | GO:0033151 | 0.001360494 | 0.022372565 |
| TCONS_00099925 | GO:0038028 | 0.001360494 | 0.022372565 |
| TCONS_00089035 | GO:0005634 | 0.001374455 | 0.042992185 |
| TCONS_00180450 | GO:0010742 | 0.001377253 | 0.011140659 |
| TCONS_00099739 | GO:0086080 | 0.001377363 | 0.025353553 |
| TCONS_00083441 | GO:0005681 | 0.001378027 | 0.011483558 |
| TCONS_00054903 | GO:0000981 | 0.001388073 | 0.019664362 |
| TCONS_00053949 | GO:0005515 | 0.001388632 | 0.037656911 |
| TCONS_00059135 | GO:0019276 | 0.001391558 | 0.009140008 |
| TCONS_00059135 | GO:0051428 | 0.001391558 | 0.009140008 |
| TCONS_00033508 | GO:0090004 | 0.001395275 | 0.038668629 |
| TCONS_00066324 | GO:0003365 | 0.001400613 | 0.028992699 |
| TCONS_00180450 | GO:0031012 | 0.001401126 | 0.011140659 |
| TCONS_00066898 | GO:0048771 | 0.00140281  | 0.042234729 |
| TCONS_00175552 | GO:0006000 | 0.001416773 | 0.015461895 |
| TCONS_00175552 | GO:0043237 | 0.001416773 | 0.015461895 |
| TCONS_00175552 | GO:0070695 | 0.001416773 | 0.015461895 |
| TCONS_00107469 | GO:0034663 | 0.00142387  | 0.025392355 |
| TCONS_00089741 | GO:0006000 | 0.001431033 | 0.020992453 |
| TCONS_00168834 | GO:0008499 | 0.001438504 | 0.019770412 |
| TCONS_00135735 | GO:0043547 | 0.001454074 | 0.029237396 |
| TCONS_00111084 | GO:0035264 | 0.001454852 | 0.0242726   |
| TCONS_00099739 | GO:0019227 | 0.001456872 | 0.025353553 |
| TCONS_00001295 | GO:0043547 | 0.001458933 | 0.026066266 |
| TCONS_00059135 | GO:0060429 | 0.001460682 | 0.00931721  |
| TCONS_00059135 | GO:0046854 | 0.001483016 | 0.00931721  |
| TCONS_00152371 | GO:0016805 | 0.001495723 | 0.039091718 |
| TCONS_00157353 | GO:0070534 | 0.001496474 | 0.032004554 |
| TCONS_00099739 | GO:0043983 | 0.001504302 | 0.025353553 |
| TCONS_00066898 | GO:0030117 | 0.001508147 | 0.042234729 |
| TCONS_00152371 | GO:0003729 | 0.001509333 | 0.039091718 |
| TCONS_00089741 | GO:0004435 | 0.001525093 | 0.020992453 |
| TCONS_00089741 | GO:0016409 | 0.001525093 | 0.020992453 |
| TCONS_00181075 | GO:0016805 | 0.001531063 | 0.024465267 |
| TCONS_00135735 | GO:0060612 | 0.001543589 | 0.029237396 |

lncRNA name-function prediction Term(Gene Ontology)

|                |            |             |             |
|----------------|------------|-------------|-------------|
| TCONS_00028509 | GO:0045056 | 0.00155129  | 0.038614573 |
| TCONS_00181075 | GO:0046854 | 0.001556799 | 0.024465267 |
| TCONS_00116477 | GO:0042403 | 0.001557495 | 0.021493428 |
| TCONS_00033508 | GO:0045056 | 0.001565883 | 0.038668629 |
| TCONS_00181075 | GO:0005669 | 0.00156947  | 0.024465267 |
| TCONS_00108000 | GO:0005515 | 0.001598512 | 0.026121407 |
| TCONS_00053949 | GO:0010447 | 0.001604573 | 0.037656911 |
| TCONS_00066324 | GO:0016579 | 0.001614613 | 0.030380628 |
| TCONS_00099739 | GO:0045162 | 0.001619271 | 0.025353553 |
| TCONS_00111084 | GO:0045056 | 0.001621358 | 0.0242726   |
| TCONS_00107469 | GO:0006778 | 0.001626404 | 0.026875688 |
| TCONS_00040392 | GO:0086080 | 0.001636391 | 0.031620092 |
| TCONS_00059135 | GO:0043401 | 0.001637575 | 0.010069344 |
| TCONS_00180450 | GO:0048240 | 0.001638404 | 0.012717133 |
| TCONS_00099925 | GO:0090292 | 0.001638555 | 0.025526969 |
| TCONS_00028510 | GO:0046835 | 0.001640422 | 0.032079357 |
| TCONS_00175552 | GO:0048846 | 0.001642674 | 0.015461895 |
| TCONS_00000679 | GO:0000381 | 0.001648428 | 0.042433189 |
| TCONS_00083441 | GO:0052695 | 0.001651664 | 0.012324837 |
| TCONS_00108000 | GO:0043044 | 0.001653254 | 0.026121407 |
| TCONS_00059692 | GO:0033120 | 0.001655203 | 0.031862664 |
| TCONS_00066898 | GO:0001726 | 0.001662045 | 0.042234729 |
| TCONS_00083441 | GO:0001656 | 0.001663853 | 0.012324837 |
| TCONS_00083441 | GO:0031492 | 0.001663853 | 0.012324837 |
| TCONS_00000678 | GO:0060020 | 0.001707392 | 0.036927041 |
| TCONS_00000678 | GO:1900028 | 0.001707392 | 0.036927041 |
| TCONS_00111084 | GO:0005515 | 0.001708678 | 0.0242726   |
| TCONS_00099739 | GO:0044822 | 0.001716647 | 0.025353553 |
| TCONS_00168834 | GO:0060480 | 0.001724164 | 0.019770412 |
| TCONS_00168834 | GO:0070254 | 0.001724164 | 0.019770412 |
| TCONS_00168834 | GO:1903896 | 0.001724164 | 0.019770412 |
| TCONS_00168834 | GO:1903899 | 0.001724164 | 0.019770412 |

## Supplementary 2

| lncRNA         | Term_ID      | P_value     | Q_value     |
|----------------|--------------|-------------|-------------|
| TCONS_00135735 | path:ko04141 | 6.08E-09    | 1.70E-07    |
| TCONS_00107469 | path:ko04141 | 5.09E-06    | 0.00014259  |
| TCONS_00107469 | path:ko03060 | 1.51E-05    | 0.000210961 |
| TCONS_00059692 | path:ko03050 | 4.42E-05    | 0.000826449 |
| TCONS_00099925 | path:ko04141 | 5.31E-05    | 0.000796437 |
| TCONS_00059692 | path:ko04068 | 6.04E-05    | 0.000826449 |
| TCONS_00135735 | path:ko03050 | 8.08E-05    | 0.000917869 |
| TCONS_00135735 | path:ko00190 | 9.83E-05    | 0.000917869 |
| TCONS_00059692 | path:ko03060 | 0.000122301 | 0.000826449 |
| TCONS_00001295 | path:ko03040 | 0.000123513 | 0.002134295 |
| TCONS_00059692 | path:ko04722 | 0.000124085 | 0.000826449 |
| TCONS_00059692 | path:ko03040 | 0.000129133 | 0.000826449 |
| TCONS_00135735 | path:ko03060 | 0.00013799  | 0.000965933 |
| TCONS_00152371 | path:ko00190 | 0.000142662 | 0.003851864 |
| TCONS_00066898 | path:ko04722 | 0.000182799 | 0.003858247 |
| TCONS_00135735 | path:ko04722 | 0.000187154 | 0.001048064 |
| TCONS_00107469 | path:ko04068 | 0.000221813 | 0.001913475 |
| TCONS_00001295 | path:ko03050 | 0.000237144 | 0.002134295 |
| TCONS_00066898 | path:ko04670 | 0.00024379  | 0.003858247 |
| TCONS_00152371 | path:ko03040 | 0.000301974 | 0.004076654 |
| TCONS_00181075 | path:ko00190 | 0.000326565 | 0.004797554 |
| TCONS_00107469 | path:ko00190 | 0.000331477 | 0.001913475 |
| TCONS_00107469 | path:ko03040 | 0.000368639 | 0.001913475 |
| TCONS_00107469 | path:ko03050 | 0.00041003  | 0.001913475 |
| TCONS_00000678 | path:ko04919 | 0.000412981 | 0.007433666 |
| TCONS_00181075 | path:ko04919 | 0.000417179 | 0.004797554 |
| TCONS_00066898 | path:ko04068 | 0.000465869 | 0.003858247 |
| TCONS_00066898 | path:ko04210 | 0.000482281 | 0.003858247 |
| TCONS_00028509 | path:ko00603 | 0.000524472 | 0.015734156 |
| TCONS_00089751 | path:ko03050 | 0.000622963 | 0.005606664 |
| TCONS_00089741 | path:ko04720 | 0.000632893 | 0.010556598 |
| TCONS_00107469 | path:ko00010 | 0.000666492 | 0.002665967 |
| TCONS_00089741 | path:ko04922 | 0.000703773 | 0.010556598 |
| TCONS_00001295 | path:ko00190 | 0.000739831 | 0.004438983 |
| TCONS_00181075 | path:ko04722 | 0.000757495 | 0.005807461 |
| TCONS_00116477 | path:ko00360 | 0.00078743  | 0.006299442 |
| TCONS_00157353 | path:ko00750 | 0.000895709 | 0.013435642 |
| TCONS_00019890 | path:ko04670 | 0.000924928 | 0.016648704 |
| TCONS_00083441 | path:ko00140 | 0.000959328 | 0.009963367 |
| TCONS_00111084 | path:ko04670 | 0.001052477 | 0.016482876 |
| TCONS_00099925 | path:ko03050 | 0.001130019 | 0.008475142 |
| TCONS_00089741 | path:ko00562 | 0.001138397 | 0.011383969 |
| TCONS_00181075 | path:ko03040 | 0.001175842 | 0.006761093 |
| TCONS_00175552 | path:ko00562 | 0.00117592  | 0.01963179  |
| TCONS_00108000 | path:ko03040 | 0.001234525 | 0.011115262 |

lncRNA name-function prediction Term(KEGG pathway)

|                |              |             |             |
|----------------|--------------|-------------|-------------|
| TCONS_00108000 | path:ko00190 | 0.00135029  | 0.011115262 |
| TCONS_00066898 | path:ko04919 | 0.001393304 | 0.008917148 |
| TCONS_00107469 | path:ko04722 | 0.001476476 | 0.005167667 |
| TCONS_00111709 | path:ko04022 | 0.001506938 | 0.026661838 |
| TCONS_00083441 | path:ko00601 | 0.001532826 | 0.009963367 |
| TCONS_00089741 | path:ko04150 | 0.001537024 | 0.011527683 |
| TCONS_00108000 | path:ko04150 | 0.001587895 | 0.011115262 |
| TCONS_00099739 | path:ko03015 | 0.001604306 | 0.013679579 |
| TCONS_00175552 | path:ko00020 | 0.001675195 | 0.01963179  |
| TCONS_00152371 | path:ko04068 | 0.001739798 | 0.015658184 |
| TCONS_00040392 | path:ko04514 | 0.00175543  | 0.026331449 |
| TCONS_00053949 | path:ko04670 | 0.001916783 | 0.025738377 |
| TCONS_00008583 | path:ko00440 | 0.00193722  | 0.032923679 |
| TCONS_00135735 | path:ko04071 | 0.001943233 | 0.00906842  |
| TCONS_00066898 | path:ko04142 | 0.001953465 | 0.010368977 |
| TCONS_00180450 | path:ko02010 | 0.001964778 | 0.044448631 |
| TCONS_00175552 | path:ko04728 | 0.002103406 | 0.01963179  |
| TCONS_00089035 | path:ko04111 | 0.002225562 | 0.023468831 |
| TCONS_00059692 | path:ko00190 | 0.0022401   | 0.011947198 |
| TCONS_00001295 | path:ko04142 | 0.002243893 | 0.01009752  |
| TCONS_00066898 | path:ko04664 | 0.002268214 | 0.010368977 |
| TCONS_00111084 | path:ko04910 | 0.002273655 | 0.016482876 |
| TCONS_00181075 | path:ko00620 | 0.002321575 | 0.010679245 |
| TCONS_00111709 | path:ko04071 | 0.002359906 | 0.026661838 |
| TCONS_00111084 | path:ko04068 | 0.002378883 | 0.016482876 |
| TCONS_00028509 | path:ko00562 | 0.002415609 | 0.036234134 |
| TCONS_00099739 | path:ko04670 | 0.002487196 | 0.013679579 |
| TCONS_00111084 | path:ko04150 | 0.002524431 | 0.016482876 |
| TCONS_00059135 | path:ko00830 | 0.002677087 | 0.037479222 |
| TCONS_00053949 | path:ko04919 | 0.002700781 | 0.025738377 |
| TCONS_00116477 | path:ko00563 | 0.002808589 | 0.011234355 |
| TCONS_00089741 | path:ko04724 | 0.002818202 | 0.016768246 |
| TCONS_00111709 | path:ko04014 | 0.002856625 | 0.026661838 |
| TCONS_00089035 | path:ko04670 | 0.002933604 | 0.023468831 |
| TCONS_00001295 | path:ko04011 | 0.002939474 | 0.010582108 |
| TCONS_00152371 | path:ko04722 | 0.002959714 | 0.018282165 |
| TCONS_00111084 | path:ko04066 | 0.003006026 | 0.016482876 |
| TCONS_00111084 | path:ko04014 | 0.003317887 | 0.016482876 |
| TCONS_00089741 | path:ko04662 | 0.003353649 | 0.016768246 |
| TCONS_00181075 | path:ko04141 | 0.00343243  | 0.013157648 |
| TCONS_00152371 | path:ko03050 | 0.003491312 | 0.018282165 |
| TCONS_00040392 | path:ko04662 | 0.003644816 | 0.027336123 |
| TCONS_00111084 | path:ko04722 | 0.003722733 | 0.016482876 |
| TCONS_00107469 | path:ko04621 | 0.003775219 | 0.011745127 |
| TCONS_00053949 | path:ko04142 | 0.003811702 | 0.025738377 |
| TCONS_00111084 | path:ko04210 | 0.003878324 | 0.016482876 |
| TCONS_00053949 | path:ko04530 | 0.00411814  | 0.025738377 |

## lncRNA name-function prediction Term(KEGG pathway)

|                |              |             |             |
|----------------|--------------|-------------|-------------|
| TCONS_00152371 | path:ko03013 | 0.004148262 | 0.018282165 |
| TCONS_00108000 | path:ko04068 | 0.004165251 | 0.020896786 |
| TCONS_00066898 | path:ko03040 | 0.00418392  | 0.016735681 |
| TCONS_00111709 | path:ko04664 | 0.004299252 | 0.02983066  |
| TCONS_00059692 | path:ko04141 | 0.004460006 | 0.018906271 |
| TCONS_00001295 | path:ko04145 | 0.004463293 | 0.01338988  |
| TCONS_00111084 | path:ko04919 | 0.004468984 | 0.016882829 |
| TCONS_00028509 | path:ko00563 | 0.004471245 | 0.039109544 |
| TCONS_00008583 | path:ko04922 | 0.004605765 | 0.032923679 |
| TCONS_00089035 | path:ko04142 | 0.004645041 | 0.02477355  |
| TCONS_00089741 | path:ko04213 | 0.004654452 | 0.017620092 |
| TCONS_00000679 | path:ko03015 | 0.004692561 | 0.037290544 |
| TCONS_00089741 | path:ko04919 | 0.004698691 | 0.017620092 |
| TCONS_00033508 | path:ko00563 | 0.004714282 | 0.031091362 |
| TCONS_00059692 | path:ko03013 | 0.004726568 | 0.018906271 |
| TCONS_00135735 | path:ko03040 | 0.004761593 | 0.017619185 |
| TCONS_00181075 | path:ko04310 | 0.004851262 | 0.01593986  |
| TCONS_00108000 | path:ko04620 | 0.004975425 | 0.020896786 |
| TCONS_00152371 | path:ko04150 | 0.004980423 | 0.018282165 |
| TCONS_00028510 | path:ko04750 | 0.005010231 | 0.0472033   |
| TCONS_00135735 | path:ko00020 | 0.005034053 | 0.017619185 |
| TCONS_00175552 | path:ko04724 | 0.005365837 | 0.037560858 |
| TCONS_00054903 | path:ko00562 | 0.005409663 | 0.049956277 |
| TCONS_00152371 | path:ko03015 | 0.005416938 | 0.018282165 |
| TCONS_00111084 | path:ko00310 | 0.005495712 | 0.018685421 |
| TCONS_00008583 | path:ko00310 | 0.005514824 | 0.032923679 |
| TCONS_00001295 | path:ko00020 | 0.005574174 | 0.014333589 |
| TCONS_00059692 | path:ko04919 | 0.005656209 | 0.020110966 |
| TCONS_00066324 | path:ko00440 | 0.005698741 | 0.044355285 |
| TCONS_00053949 | path:ko04510 | 0.005739792 | 0.028698961 |
| TCONS_00135735 | path:ko04730 | 0.005949121 | 0.018508376 |
| TCONS_00019890 | path:ko04727 | 0.005973279 | 0.023578991 |
| TCONS_00033508 | path:ko00562 | 0.005986717 | 0.031091362 |
| TCONS_00111709 | path:ko04915 | 0.006036923 | 0.02983066  |
| TCONS_00040392 | path:ko00440 | 0.006038877 | 0.029537008 |
| TCONS_00059135 | path:ko02010 | 0.006170881 | 0.042952503 |
| TCONS_00019890 | path:ko04520 | 0.006356399 | 0.023578991 |
| TCONS_00019890 | path:ko00900 | 0.006377995 | 0.023578991 |
| TCONS_00111709 | path:ko04972 | 0.006392284 | 0.02983066  |
| TCONS_00019890 | path:ko04390 | 0.00654972  | 0.023578991 |
| TCONS_00059692 | path:ko04621 | 0.006650096 | 0.021280307 |
| TCONS_00099739 | path:ko04111 | 0.006789106 | 0.022506227 |
| TCONS_00008583 | path:ko04919 | 0.006931301 | 0.032923679 |
| TCONS_00028509 | path:ko00860 | 0.006952108 | 0.039109544 |
| TCONS_00066898 | path:ko03015 | 0.007071436 | 0.024512659 |
| TCONS_00089741 | path:ko04750 | 0.007144874 | 0.021567946 |
| TCONS_00135735 | path:ko04540 | 0.007181412 | 0.020107954 |

lncRNA name-function prediction Term(KEGG pathway)

|                |              |             |             |
|----------------|--------------|-------------|-------------|
| TCONS_00089035 | path:ko04113 | 0.007186373 | 0.028745492 |
| TCONS_00000679 | path:ko04962 | 0.007186603 | 0.037290544 |
| TCONS_00111084 | path:ko04664 | 0.007246503 | 0.022398282 |
| TCONS_00108000 | path:ko04919 | 0.007289932 | 0.025514761 |
| TCONS_00000679 | path:ko04670 | 0.007292573 | 0.037290544 |
| TCONS_00181075 | path:ko04730 | 0.007313653 | 0.021026752 |
| TCONS_00033508 | path:ko04630 | 0.007433101 | 0.031091362 |
| TCONS_00168834 | path:ko00510 | 0.007448373 | 0.031895438 |
| TCONS_00099925 | path:ko04120 | 0.007498373 | 0.037491864 |
| TCONS_00066898 | path:ko04011 | 0.007660206 | 0.024512659 |
| TCONS_00054903 | path:ko04919 | 0.00767683  | 0.049956277 |
| TCONS_00180450 | path:ko04727 | 0.007934834 | 0.044448631 |
| TCONS_00168834 | path:ko04668 | 0.007938484 | 0.031895438 |
| TCONS_00157353 | path:ko00052 | 0.008031184 | 0.045002043 |
| TCONS_00107469 | path:ko04390 | 0.008074777 | 0.022609376 |
| TCONS_00089741 | path:ko04062 | 0.008188465 | 0.021567946 |
| TCONS_00040392 | path:ko00310 | 0.008285452 | 0.029537008 |
| TCONS_00180450 | path:ko04520 | 0.008360938 | 0.044448631 |
| TCONS_00089741 | path:ko04070 | 0.008435812 | 0.021567946 |
| TCONS_00152371 | path:ko04530 | 0.008461687 | 0.02538506  |
| TCONS_00089741 | path:ko04611 | 0.008627178 | 0.021567946 |
| TCONS_00175552 | path:ko00750 | 0.00863519  | 0.038639818 |
| TCONS_00083441 | path:ko04514 | 0.008713586 | 0.030432493 |
| TCONS_00107469 | path:ko03008 | 0.008956811 | 0.022799156 |
| TCONS_00175552 | path:ko01210 | 0.009024309 | 0.038639818 |
| TCONS_00180450 | path:ko04916 | 0.009087396 | 0.044448631 |
| TCONS_00053949 | path:ko04620 | 0.009190909 | 0.03548045  |
| TCONS_00066898 | path:ko04071 | 0.009195233 | 0.026713192 |
| TCONS_00000679 | path:ko04390 | 0.009322636 | 0.037290544 |
| TCONS_00028510 | path:ko03460 | 0.009411867 | 0.0472033   |
| TCONS_00111084 | path:ko04668 | 0.009631408 | 0.027288989 |
| TCONS_00111709 | path:ko00565 | 0.009769351 | 0.033123865 |
| TCONS_00089035 | path:ko00900 | 0.009849447 | 0.031518231 |
| TCONS_00111709 | path:ko04072 | 0.0099278   | 0.033123865 |
| TCONS_00053949 | path:ko04211 | 0.009934526 | 0.03548045  |
| TCONS_00107469 | path:ko00620 | 0.010032089 | 0.023408207 |
| TCONS_00099925 | path:ko00630 | 0.010205834 | 0.038271878 |
| TCONS_00028509 | path:ko04070 | 0.010243245 | 0.039109544 |
| TCONS_00059692 | path:ko04146 | 0.010325735 | 0.02650872  |
| TCONS_00008583 | path:ko00860 | 0.01045523  | 0.034947739 |
| TCONS_00033508 | path:ko00600 | 0.010570374 | 0.031091362 |
| TCONS_00083441 | path:ko00040 | 0.010581803 | 0.030432493 |
| TCONS_00028510 | path:ko04915 | 0.010586921 | 0.0472033   |
| TCONS_00116477 | path:ko00340 | 0.01069288  | 0.026811614 |
| TCONS_00066898 | path:ko04660 | 0.010817012 | 0.026713192 |
| TCONS_00028510 | path:ko04064 | 0.010921972 | 0.0472033   |
| TCONS_00175552 | path:ko04350 | 0.011102961 | 0.038639818 |



## lncRNA name-function prediction Term(KEGG pathway)

|                |              |             |             |
|----------------|--------------|-------------|-------------|
| TCONS_00181075 | path:ko03013 | 0.011143699 | 0.026011223 |
| TCONS_00099739 | path:ko04514 | 0.011249838 | 0.022506227 |
| TCONS_00181075 | path:ko04071 | 0.011309227 | 0.026011223 |
| TCONS_00028510 | path:ko04972 | 0.011385839 | 0.0472033   |
| TCONS_00108000 | path:ko03013 | 0.011396274 | 0.027045907 |
| TCONS_00008583 | path:ko04360 | 0.011497151 | 0.034947739 |
| TCONS_00066898 | path:ko04668 | 0.011574581 | 0.026713192 |
| TCONS_00180450 | path:ko04670 | 0.011578721 | 0.044448631 |
| TCONS_00059692 | path:ko04013 | 0.011599754 | 0.02650872  |
| TCONS_00066898 | path:ko04014 | 0.011687022 | 0.026713192 |
| TCONS_00083441 | path:ko00830 | 0.011704805 | 0.030432493 |
| TCONS_00162688 | path:ko00860 | 0.011719605 | 0.040915995 |
| TCONS_00180450 | path:ko00830 | 0.011725652 | 0.044448631 |
| TCONS_00066324 | path:ko04380 | 0.011831808 | 0.044355285 |
| TCONS_00059692 | path:ko04662 | 0.011861603 | 0.02650872  |
| TCONS_00028509 | path:ko04391 | 0.011956789 | 0.039109544 |
| TCONS_00033508 | path:ko04066 | 0.011958216 | 0.031091362 |
| TCONS_00152371 | path:ko04919 | 0.011979539 | 0.028628991 |
| TCONS_00059692 | path:ko03070 | 0.011991574 | 0.02650872  |
| TCONS_00053949 | path:ko03040 | 0.012018584 | 0.037081412 |
| TCONS_00099739 | path:ko04142 | 0.012049052 | 0.022506227 |
| TCONS_00162688 | path:ko00603 | 0.012162183 | 0.040915995 |
| TCONS_00111709 | path:ko04962 | 0.012239388 | 0.033123865 |
| TCONS_00059692 | path:ko04917 | 0.012425963 | 0.02650872  |
| TCONS_00175552 | path:ko04360 | 0.012486279 | 0.038639818 |
| TCONS_00099739 | path:ko00190 | 0.012524125 | 0.022506227 |
| TCONS_00181075 | path:ko04070 | 0.012531488 | 0.026202202 |
| TCONS_00054903 | path:ko04011 | 0.012554432 | 0.049956277 |
| TCONS_00152371 | path:ko04145 | 0.012575965 | 0.028628991 |
| TCONS_00162688 | path:ko00562 | 0.012613712 | 0.040915995 |
| TCONS_00111084 | path:ko04071 | 0.012664344 | 0.032853428 |
| TCONS_00152371 | path:ko00232 | 0.012723996 | 0.028628991 |
| TCONS_00059135 | path:ko04710 | 0.012737519 | 0.042952503 |
| TCONS_00008583 | path:ko04070 | 0.012875483 | 0.034947739 |
| TCONS_00111709 | path:ko03013 | 0.012893088 | 0.033123865 |
| TCONS_00175552 | path:ko04922 | 0.012906754 | 0.038639818 |
| TCONS_00028509 | path:ko04713 | 0.013084777 | 0.039109544 |
| TCONS_00066898 | path:ko04910 | 0.01309667  | 0.027182338 |
| TCONS_00040392 | path:ko04510 | 0.013188784 | 0.029537008 |
| TCONS_00108000 | path:ko04213 | 0.013188828 | 0.027045907 |
| TCONS_00028509 | path:ko04973 | 0.013191932 | 0.039109544 |
| TCONS_00099925 | path:ko04064 | 0.013199291 | 0.039597872 |
| TCONS_00089751 | path:ko04142 | 0.013227653 | 0.029000268 |
| TCONS_00028509 | path:ko04211 | 0.013230338 | 0.039109544 |
| TCONS_00111709 | path:ko00603 | 0.013408428 | 0.033123865 |
| TCONS_00066898 | path:ko04620 | 0.013591169 | 0.027182338 |
| TCONS_00168834 | path:ko04664 | 0.013645965 | 0.031895438 |

lncRNA name-function prediction Term(KEGG pathway)

|                |              |             |             |
|----------------|--------------|-------------|-------------|
| TCONS_00053949 | path:ko04072 | 0.01365081  | 0.037081412 |
| TCONS_00040392 | path:ko04611 | 0.013764889 | 0.029537008 |
| TCONS_00040392 | path:ko04512 | 0.013783937 | 0.029537008 |
| TCONS_00108000 | path:ko04310 | 0.013789924 | 0.027045907 |
| TCONS_00175552 | path:ko04725 | 0.013799935 | 0.038639818 |
| TCONS_00168834 | path:ko04012 | 0.013800292 | 0.031895438 |
| TCONS_00000678 | path:ko04130 | 0.01402669  | 0.037853323 |
| TCONS_00028509 | path:ko04668 | 0.014084875 | 0.039109544 |
| TCONS_00108000 | path:ko04660 | 0.014088297 | 0.027045907 |
| TCONS_00108000 | path:ko04910 | 0.014166904 | 0.027045907 |
| TCONS_00135735 | path:ko00604 | 0.014278251 | 0.036307658 |
| TCONS_00099739 | path:ko00510 | 0.014322144 | 0.022506227 |
| TCONS_00116477 | path:ko04630 | 0.01432828  | 0.026811614 |
| TCONS_00089741 | path:ko00310 | 0.014390294 | 0.03320837  |
| TCONS_00111709 | path:ko04919 | 0.014423629 | 0.033123865 |
| TCONS_00028510 | path:ko04391 | 0.014488579 | 0.0472033   |
| TCONS_00033508 | path:ko00020 | 0.01452461  | 0.031469989 |
| TCONS_00066898 | path:ko04391 | 0.014698308 | 0.02752654  |
| TCONS_00107469 | path:ko04391 | 0.014782449 | 0.031839122 |
| TCONS_00089751 | path:ko04114 | 0.015131644 | 0.029000268 |
| TCONS_00111084 | path:ko00562 | 0.015277847 | 0.032853428 |
| TCONS_00111709 | path:ko04530 | 0.015378938 | 0.033123865 |
| TCONS_00066898 | path:ko04212 | 0.015483679 | 0.02752654  |
| TCONS_00157353 | path:ko04390 | 0.015484514 | 0.045002043 |
| TCONS_00059692 | path:ko03008 | 0.015519772 | 0.029880071 |
| TCONS_00000678 | path:ko00380 | 0.015527853 | 0.037853323 |
| TCONS_00135735 | path:ko04072 | 0.015560425 | 0.036307658 |
| TCONS_00083441 | path:ko04975 | 0.015576866 | 0.033749876 |
| TCONS_00180450 | path:ko04111 | 0.015592154 | 0.044448631 |
| TCONS_00089035 | path:ko04922 | 0.015716317 | 0.039842796 |
| TCONS_00053949 | path:ko04062 | 0.015856446 | 0.037081412 |
| TCONS_00059692 | path:ko00232 | 0.015873788 | 0.029880071 |
| TCONS_00152371 | path:ko04142 | 0.01589001  | 0.033002329 |
| TCONS_00059135 | path:ko04727 | 0.016016666 | 0.042952503 |
| TCONS_00168834 | path:ko04966 | 0.016086859 | 0.031895438 |
| TCONS_00181075 | path:ko04068 | 0.016317194 | 0.031274623 |
| TCONS_00111084 | path:ko03015 | 0.016375487 | 0.032853428 |
| TCONS_00089741 | path:ko04020 | 0.016424554 | 0.035195473 |
| TCONS_00168834 | path:ko04360 | 0.016479712 | 0.031895438 |
| TCONS_00111084 | path:ko04530 | 0.016493836 | 0.032853428 |
| TCONS_00008583 | path:ko04142 | 0.016707191 | 0.037993683 |
| TCONS_00175552 | path:ko01230 | 0.016721814 | 0.039269201 |
| TCONS_00116477 | path:ko00750 | 0.016757259 | 0.026811614 |
| TCONS_00162688 | path:ko04910 | 0.016775948 | 0.040915995 |
| TCONS_00059135 | path:ko04610 | 0.016784255 | 0.042952503 |
| TCONS_00000679 | path:ko00480 | 0.016816654 | 0.045130645 |
| TCONS_00053949 | path:ko04152 | 0.016826732 | 0.037081412 |

## lncRNA name-function prediction Term(KEGG pathway)

|                |              |             |             |
|----------------|--------------|-------------|-------------|
| TCONS_00028510 | path:ko04011 | 0.016926138 | 0.0472033   |
| TCONS_00028509 | path:ko04962 | 0.016957867 | 0.039109544 |
| TCONS_00111084 | path:ko04211 | 0.017071402 | 0.032853428 |
| TCONS_00180450 | path:ko00900 | 0.017073705 | 0.044448631 |
| TCONS_00040392 | path:ko04120 | 0.017161774 | 0.031632002 |
| TCONS_00059692 | path:ko04660 | 0.017251812 | 0.03021989  |
| TCONS_00089751 | path:ko04360 | 0.017389231 | 0.029000268 |
| TCONS_00111084 | path:ko04145 | 0.017392991 | 0.032853428 |
| TCONS_00089035 | path:ko00051 | 0.017431223 | 0.039842796 |
| TCONS_00135735 | path:ko00010 | 0.017434684 | 0.037551627 |
| TCONS_00028509 | path:ko04071 | 0.017714738 | 0.039109544 |
| TCONS_00111709 | path:ko04722 | 0.017715141 | 0.033189773 |
| TCONS_00000678 | path:ko00260 | 0.017750108 | 0.037853323 |
| TCONS_00000678 | path:ko04011 | 0.017750108 | 0.037853323 |
| TCONS_00111709 | path:ko04921 | 0.017780235 | 0.033189773 |
| TCONS_00162688 | path:ko04710 | 0.017842426 | 0.040915995 |
| TCONS_00089751 | path:ko04660 | 0.01785869  | 0.029000268 |
| TCONS_00053949 | path:ko04022 | 0.017860151 | 0.037081412 |
| TCONS_00162688 | path:ko04610 | 0.017894544 | 0.040915995 |
| TCONS_00152371 | path:ko04670 | 0.017931101 | 0.034581409 |
| TCONS_00059692 | path:ko04024 | 0.017943059 | 0.03021989  |
| TCONS_00028509 | path:ko04213 | 0.017948911 | 0.039109544 |
| TCONS_00008583 | path:ko00051 | 0.017997008 | 0.037993683 |
| TCONS_00107469 | path:ko04013 | 0.018119269 | 0.035491753 |
| TCONS_00066324 | path:ko03460 | 0.018218115 | 0.044355285 |
| TCONS_00000678 | path:ko00052 | 0.018248597 | 0.037853323 |
| TCONS_00108000 | path:ko00510 | 0.018656912 | 0.032649597 |
| TCONS_00000678 | path:ko04142 | 0.018752196 | 0.037853323 |
| TCONS_00175552 | path:ko00360 | 0.018763894 | 0.039269201 |
| TCONS_00054903 | path:ko04360 | 0.018880745 | 0.049956277 |
| TCONS_00107469 | path:ko03013 | 0.019013439 | 0.035491753 |
| TCONS_00001295 | path:ko04962 | 0.019047171 | 0.042856134 |
| TCONS_00175552 | path:ko04720 | 0.019049384 | 0.039269201 |
| TCONS_00000679 | path:ko03040 | 0.019113193 | 0.045130645 |
| TCONS_00089741 | path:ko04923 | 0.019173757 | 0.038034353 |
| TCONS_00028509 | path:ko04310 | 0.019184547 | 0.039109544 |
| TCONS_00000678 | path:ko00281 | 0.019635742 | 0.037853323 |
| TCONS_00066898 | path:ko04150 | 0.019678669 | 0.033143021 |
| TCONS_00180450 | path:ko04113 | 0.019808437 | 0.044448631 |
| TCONS_00089741 | path:ko04510 | 0.020284988 | 0.038034353 |
| TCONS_00040392 | path:ko03460 | 0.020300081 | 0.031632002 |
| TCONS_00059692 | path:ko04145 | 0.02050398  | 0.031430466 |
| TCONS_00059692 | path:ko04070 | 0.020626243 | 0.031430466 |
| TCONS_00152371 | path:ko04071 | 0.020631272 | 0.03713629  |
| TCONS_00107469 | path:ko00232 | 0.020650535 | 0.036138436 |
| TCONS_00089751 | path:ko04113 | 0.02066367  | 0.029000268 |
| TCONS_00168834 | path:ko00603 | 0.020692803 | 0.031895438 |

lncRNA name-function prediction Term(KEGG pathway)

|                |              |             |             |
|----------------|--------------|-------------|-------------|
| TCONS_00181075 | path:ko04540 | 0.020694005 | 0.034608137 |
| TCONS_00135735 | path:ko04360 | 0.020778541 | 0.041557082 |
| TCONS_00000678 | path:ko03040 | 0.020806219 | 0.037853323 |
| TCONS_00180450 | path:ko04015 | 0.020919413 | 0.044448631 |
| TCONS_00000678 | path:ko03015 | 0.021029624 | 0.037853323 |
| TCONS_00175552 | path:ko04320 | 0.021057216 | 0.039269201 |
| TCONS_00181075 | path:ko04011 | 0.021065822 | 0.034608137 |
| TCONS_00059135 | path:ko00480 | 0.021117413 | 0.042952503 |
| TCONS_00111709 | path:ko04910 | 0.021221649 | 0.035108043 |
| TCONS_00111709 | path:ko04212 | 0.021315598 | 0.035108043 |
| TCONS_00108000 | path:ko04722 | 0.021393336 | 0.034558466 |
| TCONS_00162688 | path:ko03460 | 0.021403902 | 0.040915995 |
| TCONS_00054903 | path:ko00563 | 0.021405192 | 0.049956277 |
| TCONS_00175552 | path:ko04550 | 0.0214442   | 0.039269201 |
| TCONS_00059135 | path:ko04152 | 0.021476252 | 0.042952503 |
| TCONS_00111084 | path:ko03013 | 0.02179419  | 0.037103305 |
| TCONS_00111084 | path:ko04213 | 0.021825474 | 0.037103305 |
| TCONS_00180450 | path:ko04114 | 0.021952311 | 0.044448631 |
| TCONS_00040392 | path:ko04064 | 0.021954987 | 0.031632002 |
| TCONS_00008583 | path:ko00564 | 0.02205463  | 0.039226943 |
| TCONS_00001295 | path:ko04111 | 0.02223476  | 0.04361725  |
| TCONS_00066898 | path:ko04962 | 0.022378274 | 0.035805238 |
| TCONS_00019890 | path:ko03015 | 0.022385542 | 0.046396193 |
| TCONS_00028509 | path:ko04360 | 0.022387235 | 0.039109544 |
| TCONS_00168834 | path:ko04810 | 0.022437382 | 0.031895438 |
| TCONS_00175552 | path:ko00563 | 0.022439544 | 0.039269201 |
| TCONS_00089741 | path:ko04726 | 0.022444939 | 0.039608715 |
| TCONS_00089751 | path:ko04350 | 0.022555764 | 0.029000268 |
| TCONS_00162688 | path:ko00563 | 0.022615191 | 0.040915995 |
| TCONS_00008583 | path:ko04660 | 0.022710336 | 0.039226943 |
| TCONS_00028509 | path:ko04510 | 0.022797055 | 0.039109544 |
| TCONS_00028510 | path:ko04919 | 0.022887551 | 0.0472033   |
| TCONS_00162688 | path:ko04071 | 0.023015247 | 0.040915995 |
| TCONS_00040392 | path:ko04922 | 0.023196802 | 0.031632002 |
| TCONS_00028509 | path:ko04725 | 0.023236079 | 0.039109544 |
| TCONS_00089035 | path:ko00270 | 0.023257521 | 0.045292376 |
| TCONS_00111709 | path:ko04370 | 0.02332178  | 0.035243248 |
| TCONS_00152371 | path:ko00020 | 0.023343668 | 0.03769667  |
| TCONS_00028509 | path:ko04011 | 0.023465726 | 0.039109544 |
| TCONS_00028510 | path:ko04360 | 0.023573359 | 0.0472033   |
| TCONS_00066324 | path:ko04120 | 0.023634515 | 0.044355285 |
| TCONS_00180450 | path:ko04152 | 0.023645917 | 0.044448631 |
| TCONS_00053949 | path:ko04921 | 0.023653346 | 0.037081412 |
| TCONS_00180450 | path:ko04720 | 0.02369265  | 0.044448631 |
| TCONS_00168834 | path:ko00260 | 0.023769997 | 0.031895438 |
| TCONS_00066324 | path:ko04130 | 0.023777174 | 0.044355285 |
| TCONS_00175552 | path:ko04726 | 0.023910904 | 0.039382665 |

lncRNA name-function prediction Term(KEGG pathway)

|                |              |             |             |
|----------------|--------------|-------------|-------------|
| TCONS_00180450 | path:ko04024 | 0.023933878 | 0.044448631 |
| TCONS_00152371 | path:ko04626 | 0.024008244 | 0.03769667  |
| TCONS_00181075 | path:ko00010 | 0.024160774 | 0.03534546  |
| TCONS_00001295 | path:ko04722 | 0.024231806 | 0.04361725  |
| TCONS_00108000 | path:ko03050 | 0.024255822 | 0.036383733 |
| TCONS_00111709 | path:ko04730 | 0.024376188 | 0.035243248 |
| TCONS_00000678 | path:ko04139 | 0.024377377 | 0.03810127  |
| TCONS_00089741 | path:ko00532 | 0.024427773 | 0.040712954 |
| TCONS_00053949 | path:ko04060 | 0.024435592 | 0.037081412 |
| TCONS_00168834 | path:ko00670 | 0.024534952 | 0.031895438 |
| TCONS_00028509 | path:ko00230 | 0.024929612 | 0.039362546 |
| TCONS_00008583 | path:ko00562 | 0.02500144  | 0.039585613 |
| TCONS_00054903 | path:ko04310 | 0.02503272  | 0.049956277 |
| TCONS_00152371 | path:ko00010 | 0.025131114 | 0.03769667  |
| TCONS_00111709 | path:ko04611 | 0.025173749 | 0.035243248 |
| TCONS_00000678 | path:ko00051 | 0.025435699 | 0.03810127  |
| TCONS_00019890 | path:ko04916 | 0.025612623 | 0.046396193 |
| TCONS_00089035 | path:ko03015 | 0.025629777 | 0.045292376 |
| TCONS_00181075 | path:ko04745 | 0.025793517 | 0.03534546  |
| TCONS_00019890 | path:ko04728 | 0.025801646 | 0.046396193 |
| TCONS_00162688 | path:ko04391 | 0.025806271 | 0.041124077 |
| TCONS_00107469 | path:ko04210 | 0.02583605  | 0.042046445 |
| TCONS_00059135 | path:ko00900 | 0.025849656 | 0.045236898 |
| TCONS_00054903 | path:ko04211 | 0.025857226 | 0.049956277 |
| TCONS_00053949 | path:ko04920 | 0.026025898 | 0.037081412 |
| TCONS_00157353 | path:ko04550 | 0.026174689 | 0.045002043 |
| TCONS_00033508 | path:ko04514 | 0.026563106 | 0.045127218 |
| TCONS_00175552 | path:ko04611 | 0.0265963   | 0.041067843 |
| TCONS_00111084 | path:ko04212 | 0.026607586 | 0.04118166  |
| TCONS_00135735 | path:ko04070 | 0.026665744 | 0.046664796 |
| TCONS_00000679 | path:ko00510 | 0.026719105 | 0.045130645 |
| TCONS_00028509 | path:ko03018 | 0.02672492  | 0.039966246 |
| TCONS_00111709 | path:ko04966 | 0.026774455 | 0.035699273 |
| TCONS_00181075 | path:ko03022 | 0.026902515 | 0.03534546  |
| TCONS_00111084 | path:ko04966 | 0.026922041 | 0.04118166  |
| TCONS_00107469 | path:ko04011 | 0.027036377 | 0.042046445 |
| TCONS_00059692 | path:ko00620 | 0.027050319 | 0.036614976 |
| TCONS_00059692 | path:ko00750 | 0.027097875 | 0.036614976 |
| TCONS_00019890 | path:ko00523 | 0.027187748 | 0.046396193 |
| TCONS_00019890 | path:ko01055 | 0.027187748 | 0.046396193 |
| TCONS_00135735 | path:ko01200 | 0.027233208 | 0.046664796 |
| TCONS_00099739 | path:ko04966 | 0.027273304 | 0.037500794 |
| TCONS_00053949 | path:ko04071 | 0.027345758 | 0.037081412 |
| TCONS_00059692 | path:ko04391 | 0.027461232 | 0.036614976 |
| TCONS_00000678 | path:ko00533 | 0.027517584 | 0.03810127  |
| TCONS_00181075 | path:ko04915 | 0.027661664 | 0.03534546  |
| TCONS_00000679 | path:ko04145 | 0.027799997 | 0.045130645 |

lncRNA name-function prediction Term(KEGG pathway)

|                |              |             |             |
|----------------|--------------|-------------|-------------|
| TCONS_00053949 | path:ko01210 | 0.027809764 | 0.037081412 |
| TCONS_00111084 | path:ko00603 | 0.027858182 | 0.04118166  |
| TCONS_00157353 | path:ko04670 | 0.027962394 | 0.045002043 |
| TCONS_00083441 | path:ko00604 | 0.027964652 | 0.042058834 |
| TCONS_00028509 | path:ko04711 | 0.027976372 | 0.039966246 |
| TCONS_00089741 | path:ko04713 | 0.027990864 | 0.042635735 |
| TCONS_00053949 | path:ko04810 | 0.028174389 | 0.037081412 |
| TCONS_00053949 | path:ko04611 | 0.028181873 | 0.037081412 |
| TCONS_00152371 | path:ko04141 | 0.028319205 | 0.038667735 |
| TCONS_00033508 | path:ko03018 | 0.028354913 | 0.045127218 |
| TCONS_00107469 | path:ko00604 | 0.028531516 | 0.042046445 |
| TCONS_00152371 | path:ko04214 | 0.028642767 | 0.038667735 |
| TCONS_00040392 | path:ko04630 | 0.028662947 | 0.035828684 |
| TCONS_00175552 | path:ko04912 | 0.028823991 | 0.041067843 |
| TCONS_00083441 | path:ko04920 | 0.028832916 | 0.042058834 |
| TCONS_00157353 | path:ko00350 | 0.029103563 | 0.045002043 |
| TCONS_00083441 | path:ko00190 | 0.029117655 | 0.042058834 |
| TCONS_00175552 | path:ko04962 | 0.029334174 | 0.041067843 |
| TCONS_00162688 | path:ko04962 | 0.02961573  | 0.041124077 |
| TCONS_00135735 | path:ko04725 | 0.029952617 | 0.046664796 |
| TCONS_00028510 | path:ko04912 | 0.029956559 | 0.0472033   |
| TCONS_00066898 | path:ko00630 | 0.030016706 | 0.043741601 |
| TCONS_00066898 | path:ko04214 | 0.030072351 | 0.043741601 |
| TCONS_00059692 | path:ko04210 | 0.03024018  | 0.038707431 |
| TCONS_00053949 | path:ko04520 | 0.030255555 | 0.037819444 |
| TCONS_00089741 | path:ko04727 | 0.030267498 | 0.042635735 |
| TCONS_00028510 | path:ko03040 | 0.030289954 | 0.0472033   |
| TCONS_00152371 | path:ko04210 | 0.030317072 | 0.038979092 |
| TCONS_00000678 | path:ko04145 | 0.030369567 | 0.038693808 |
| TCONS_00000679 | path:ko04142 | 0.030612992 | 0.045130645 |
| TCONS_00099925 | path:ko04622 | 0.030772891 | 0.049553222 |
| TCONS_00162688 | path:ko04630 | 0.030843058 | 0.041124077 |
| TCONS_00008583 | path:ko04011 | 0.030859733 | 0.045102687 |
| TCONS_00107469 | path:ko04915 | 0.030872688 | 0.043221764 |
| TCONS_00180450 | path:ko04080 | 0.03099729  | 0.048662283 |
| TCONS_00168834 | path:ko04145 | 0.031001376 | 0.035015922 |
| TCONS_00099925 | path:ko04710 | 0.031192478 | 0.049553222 |
| TCONS_00135735 | path:ko04745 | 0.031200058 | 0.046664796 |
| TCONS_00028509 | path:ko04921 | 0.031222352 | 0.042575934 |
| TCONS_00000679 | path:ko00720 | 0.03131669  | 0.045130645 |
| TCONS_00066324 | path:ko04662 | 0.03132526  | 0.044355285 |
| TCONS_00111709 | path:ko04211 | 0.03132607  | 0.037830436 |
| TCONS_00059135 | path:ko04020 | 0.031355546 | 0.048076372 |
| TCONS_00089741 | path:ko04370 | 0.031486341 | 0.042635735 |
| TCONS_00116477 | path:ko04130 | 0.031544853 | 0.042059804 |
| TCONS_00135735 | path:ko04150 | 0.031665397 | 0.046664796 |
| TCONS_00108000 | path:ko04966 | 0.03190667  | 0.044669339 |

lncRNA name-function prediction Term(KEGG pathway)

|                |              |             |             |
|----------------|--------------|-------------|-------------|
| TCONS_00028510 | path:ko04664 | 0.031920108 | 0.0472033   |
| TCONS_00066324 | path:ko04925 | 0.031956128 | 0.044355285 |
| TCONS_00111084 | path:ko04660 | 0.032146811 | 0.044867426 |
| TCONS_00066324 | path:ko03410 | 0.032204372 | 0.044355285 |
| TCONS_00000678 | path:ko00720 | 0.03224484  | 0.038693808 |
| TCONS_00089035 | path:ko00523 | 0.032297025 | 0.045292376 |
| TCONS_00089035 | path:ko01055 | 0.032297025 | 0.045292376 |
| TCONS_00168834 | path:ko04510 | 0.032322389 | 0.035015922 |
| TCONS_00111709 | path:ko04916 | 0.032380027 | 0.037830436 |
| TCONS_00089741 | path:ko04910 | 0.032486869 | 0.042635735 |
| TCONS_00111709 | path:ko04068 | 0.032814022 | 0.037830436 |
| TCONS_00066898 | path:ko03013 | 0.032858774 | 0.044083683 |
| TCONS_00180450 | path:ko00521 | 0.032876349 | 0.048662283 |
| TCONS_00111084 | path:ko04013 | 0.032990755 | 0.044867426 |
| TCONS_00175552 | path:ko04924 | 0.033136052 | 0.044181403 |
| TCONS_00152371 | path:ko04012 | 0.033150145 | 0.040684268 |
| TCONS_00028510 | path:ko04713 | 0.033200739 | 0.0472033   |
| TCONS_00001295 | path:ko03018 | 0.033295681 | 0.047345479 |
| TCONS_00099739 | path:ko04144 | 0.033324788 | 0.040730296 |
| TCONS_00001295 | path:ko04670 | 0.033487592 | 0.047345479 |
| TCONS_00089741 | path:ko04921 | 0.033612016 | 0.042635735 |
| TCONS_00019890 | path:ko04113 | 0.033662651 | 0.046396193 |
| TCONS_00111709 | path:ko04728 | 0.033777175 | 0.037830436 |
| TCONS_00089035 | path:ko04350 | 0.033969282 | 0.045292376 |
| TCONS_00089741 | path:ko04915 | 0.034108588 | 0.042635735 |
| TCONS_00028510 | path:ko04145 | 0.034130351 | 0.0472033   |
| TCONS_00059692 | path:ko00630 | 0.034361859 | 0.041481103 |
| TCONS_00066898 | path:ko04662 | 0.034495663 | 0.044083683 |
| TCONS_00028509 | path:ko00750 | 0.034554814 | 0.0445192   |
| TCONS_00059135 | path:ko04080 | 0.034678223 | 0.048076372 |
| TCONS_00157353 | path:ko04145 | 0.034717448 | 0.045002043 |
| TCONS_00040392 | path:ko00260 | 0.034748625 | 0.038831867 |
